# Supplementary material for: Optimal bilayer composites for temperature-tracking wireless electronics
Source: Royal Society of Chemistry journal article supplement (doi:10.1039/d3nr05784d), 2024-01-01

## Supplementary Information

**Figure S1. X-ray photoelectron spectroscopy (XPS) scan of hollow silica microsphere.** The XPS scan performed to the powder of hollow silica microsphere. Chemical composition of the materials can be calculated from the data, and their values are placed on the related peaks. Na: sodium, O: oxygen, C: carbon, Si: silicon.

**Figure S2. X-ray diffraction (XRD) data of aluminum nitride and hollow silica microsphere.** Hollow silica microsphere and aluminum nitride in powder form is characterized by XRD. Aluminum nitride has prominent peaks at the diffraction angles that correspond to the library values, whereas hollow silica microsphere does not have any meaningful peaks.

**Figure S3. Mechanism of thermal transportation at a microscopic level for the proposed composites.** After heat transfer at a macroscopic level occurs, heat flux passes through the material, passes thermal energy, and changes its temperature. It is difficult for such a flux to pass through when the composite includes hollow spheres with amorphous chemical structure, and this is emphasized by dashed blue lines. On the contrary, addition of highly conductive aluminum nitride particles creates thermal bridge, which in turn promotes heat flux to pass through.

**Figure S4. Simulated thermal data of the composite layers at varied temperatures compared to pristine PDMS.** Two layered materials with different chemical composition are simulated at different ambient temperatures of 0 °C, 10 °C, 25 °C, and 45 °C. The first, representing our proposed bilayer composite, is composed of (A) PDMS-aluminum nitride composite at the top and the bottom is composed of PDMS-aluminum nitride. The temperature of the interface between the two layers is 36.6 °C when the ambient temperature is 0 °C (B) The second is composed of pure PDMS to be used as a reference (i.e. control factor). The same region of interest lost thermal maintenance and dropped to 35.4 °C, denoting more than 1 °C deviation from the skin temperature.

**Figure S5. Strain-stress curve of bilayer composites.** (A) Experimental setup for measuring strain-stress curve. (B) Strain-stress curve of aluminum nitride composite and hollow silica composite according to ratio of each solute.

**Figure S6. Thermogravimetric analysis (TGA) data of the composite layers.** Weight loss measured while heating in with inert nitrogen gas, (A) PDMS-aluminum nitride composite and (B) PDMS-hollow silica microsphere composite. Loss of 3 wt% occurs at 403.9 °C and 352.2 °C for the respective composites when heated to 300 °C.

**Figure S7. Differential scanning calorimetry (DSC) data of the composite layers.** Latent heat measured during the second heating of A) PDMS-aluminum nitride composite and B) PDMS-hollow silica microsphere composite. No latent heat, meaning no phase change was detected in the range between  $-80\text{ }^{\circ}\text{C}$  and  $250\text{ }^{\circ}\text{C}$  as there are no prominent peaks.

**Figure S8. Optical cross-section images of hollow silica composite according to the deformation state.** (A) The image of the composite in its normal state. The perpendicular and horizontal distances between hollow silica particle 1 (P1, green) and particle 2 (P2, blue) are denoted as X and Y with black scales, respectively. (B) The image of the composite in stretched state. The altered X and Y values are indicated with red scales. Compared to the normal state, an increase in the horizontal direction and a decrease in the vertical direction can be observed. (C) The image of the composite in compressed state. The altered X and Y values are indicated with red scales. Compared to the normal state, a decrease in the horizontal direction and an increase in the vertical direction can be observed.

**Figure S9. Finite-element analysis of the inductive antenna under a horizontal strain of 10% to the entire device.**

**Figure S10 A graph showing response time of the device.**

**Figure S11. Experimental setup for durability test and the resulting graph.** (A) A photo of the component submerged in a beaker of water, undergoing stirring, to verify durability and consistent thermal properties. (B) A graph of temperature recording of the device every 6 hours on the beaker. It can be confirmed that nearly identical results were obtained.

**Figure S12. Result of the sensor during 24 hours of continuous attachment. Photograph of the device on a human skin and detached state every 6 hours.**

**Figure S13. Wireless power transfer circuitry and its characteristics.** (A) Schematic top-view illustration of the device with wireless power transfer capability. (B) Circuit and block diagram of wireless power transfer device. (C) Scattering parameter comparison data between single and dual inductive antennas. The single antenna's peak frequency and power are  $13.46\text{ MHz}$  and  $-11.91\text{ dB}$ , respectively. The dual antenna's peak frequency and power are  $13.4\text{ MHz}$  and  $-8.16\text{ dB}$ , respectively. (D) The current output of wirelessly transferred power. TX ANT: transmitter antenna, RX ANT: receiver antenna.

**Figure S14. Thermoelectric plates experimental setup.** (A) The setup for thermoelectric plates experiment and (B) infrared images of upper and lower thermoelectric plates.

**Figure S15. Comparison graph of commercial temperature probe and BCTS.** A graph for comparison of temperature data acquired from a commercial temperature probe and BCTS. Minimal temperature variance is evident between the commercial probe and BCTS.

**Figure S16. Experimental setup for comparison test between BCTS and commercial temperature probe in aquatic environment.**

**Figure S17. SEM and EDS imaging of hollow silica microsphere and aluminum nitride, both in powder form.** Atoms are color-mapped in the images taken from the powder-form (A) hollow silica microsphere and (B) aluminum nitride. Si: silicon, O: oxygen, Na: sodium, Al: aluminum, N: nitrogen. Diameter of hollow silica microsphere on the left varies from 7.45  $\mu\text{m}$  to 69.07  $\mu\text{m}$ . As the aluminum nitride powders have irregular shape, longest lateral widths are measured, yielding the shortest width as 0.31  $\mu\text{m}$  and the longest as 1.17  $\mu\text{m}$ .

Figure S1

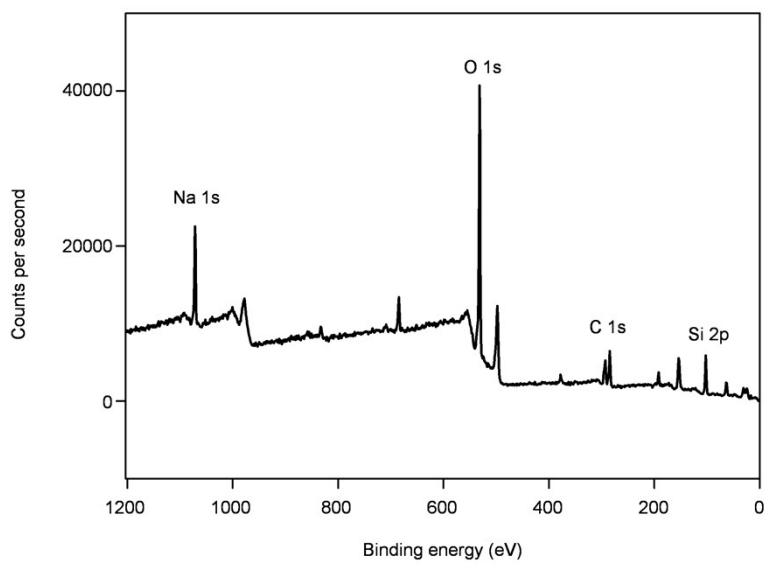

Figure S2

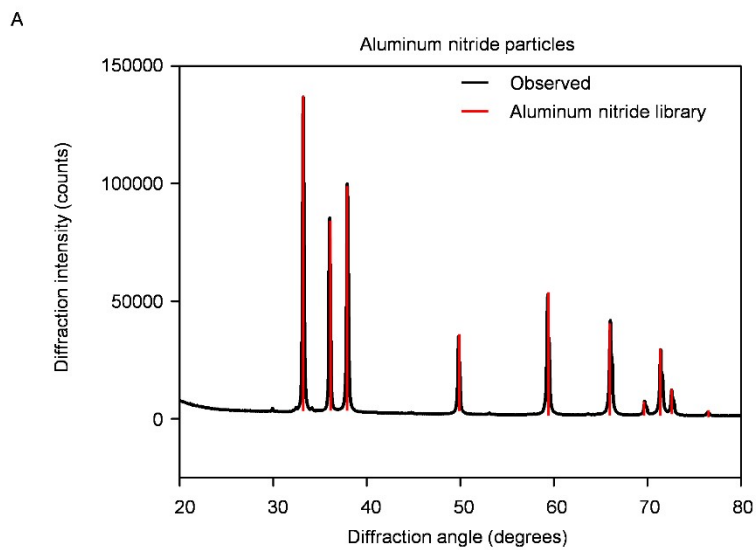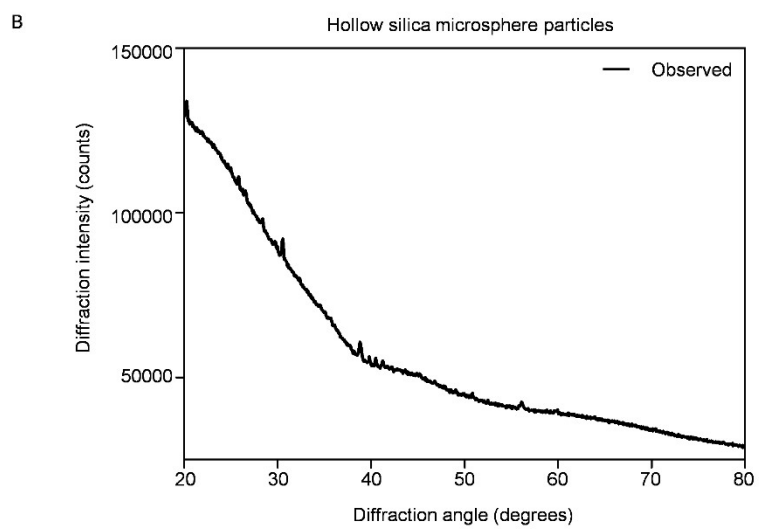

Figure S3

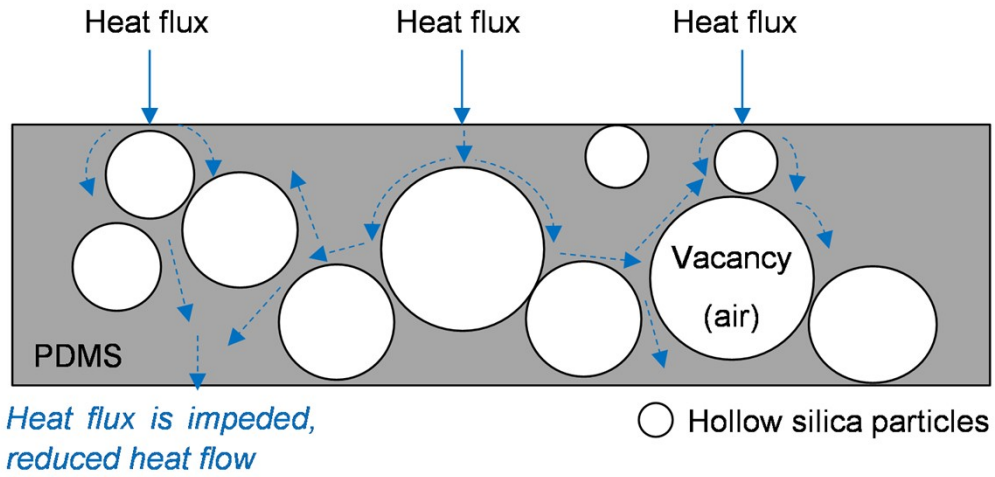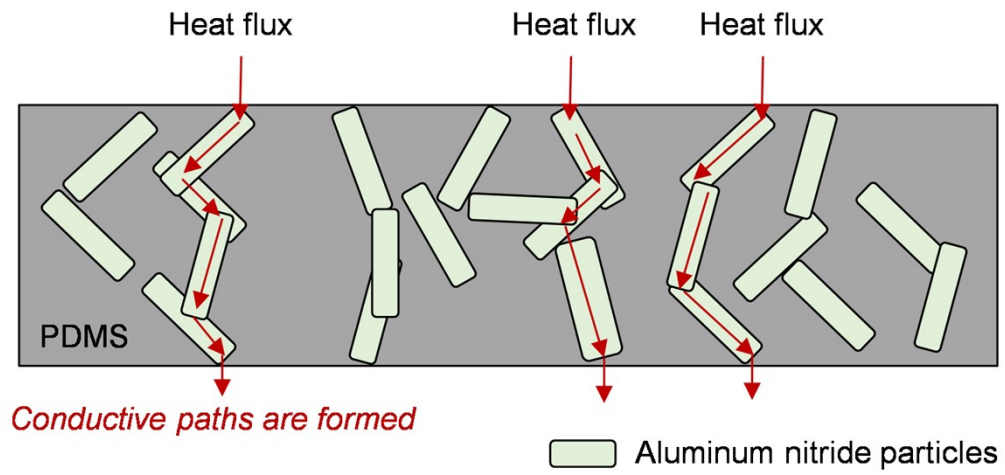

Figure S4

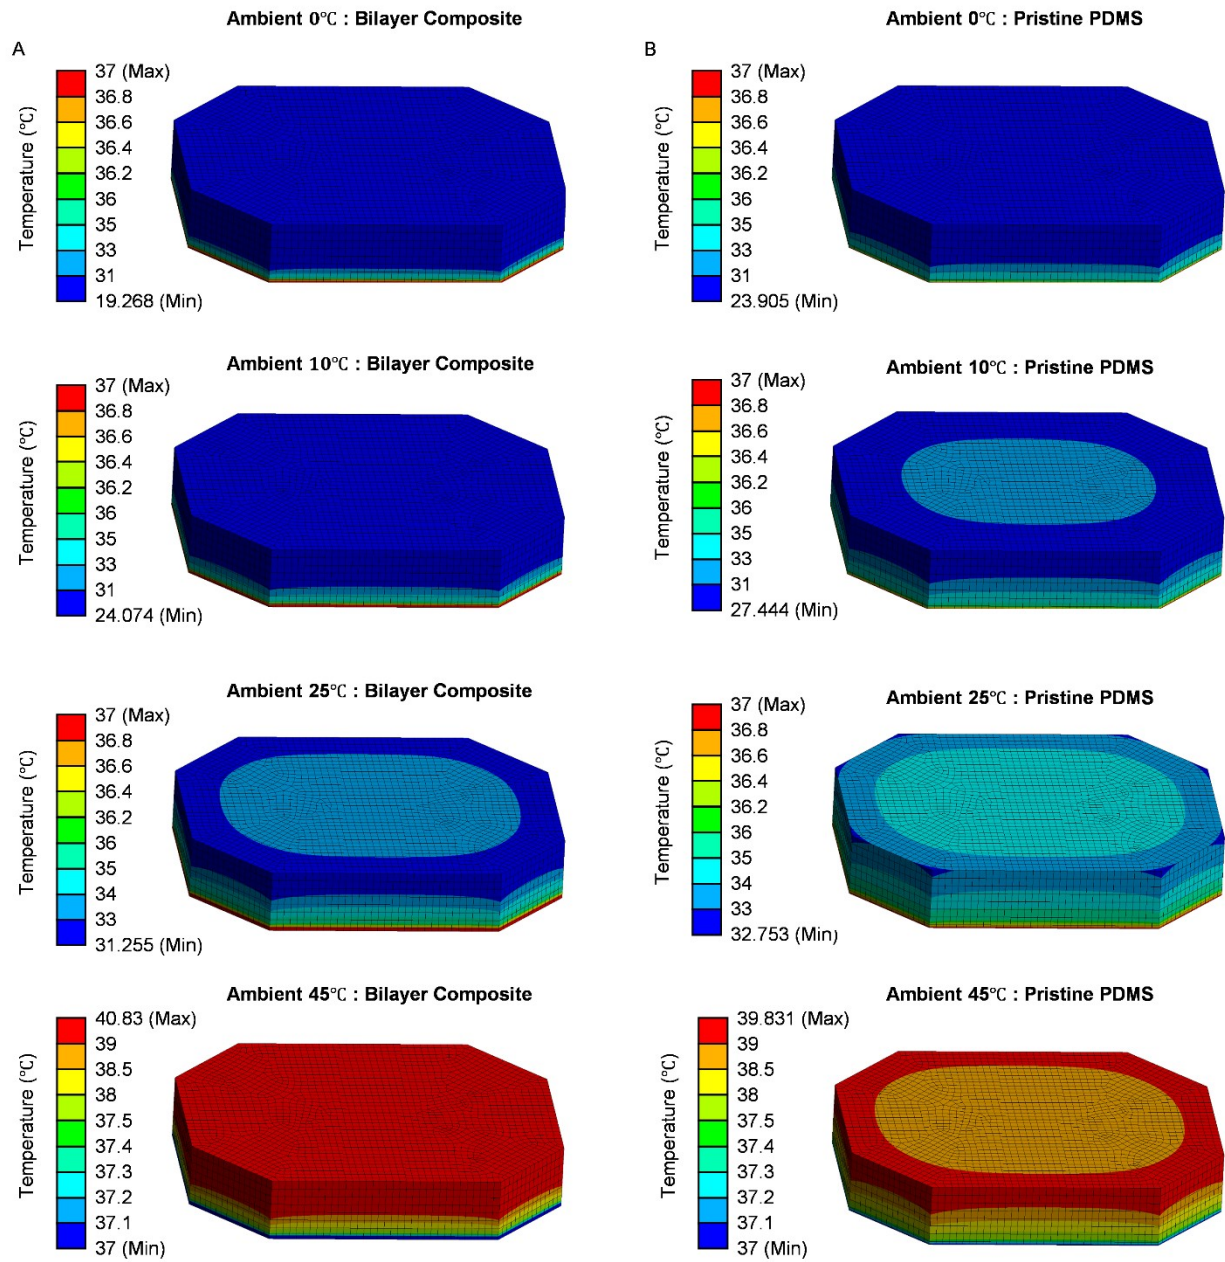

Figure S5

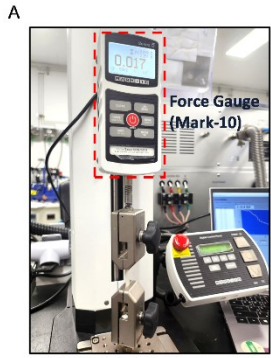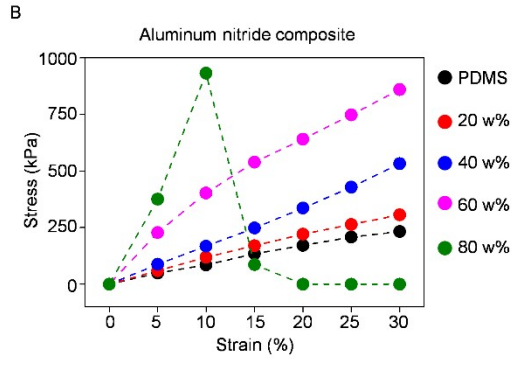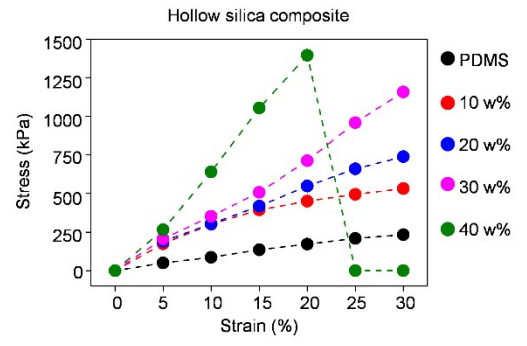



Figure S6

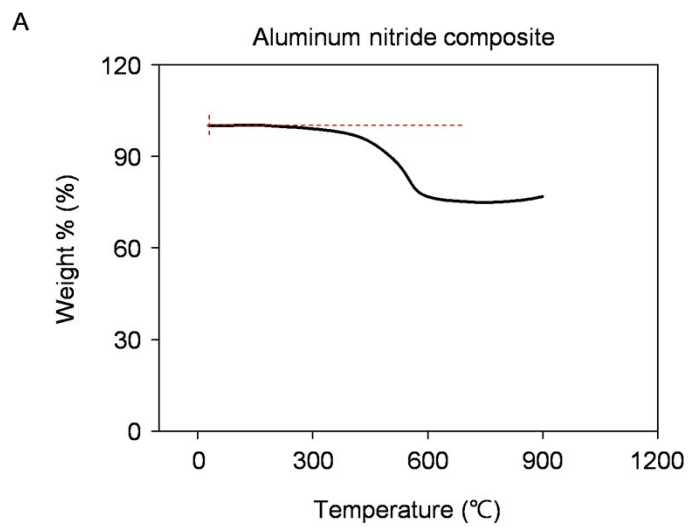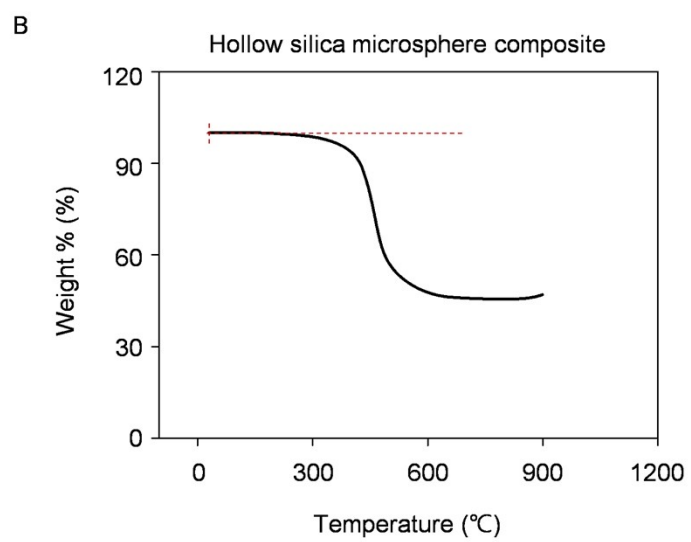

Figure S7

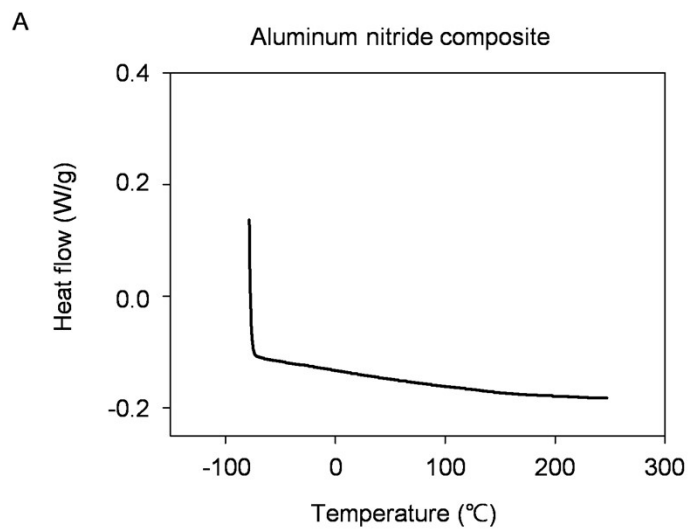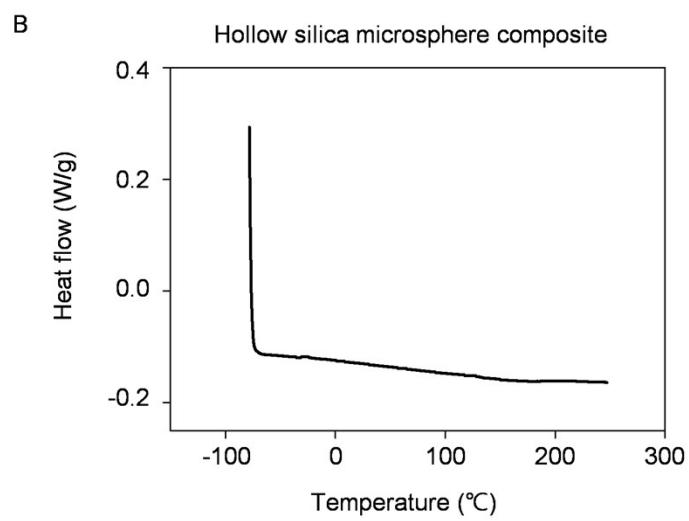

Figure S8

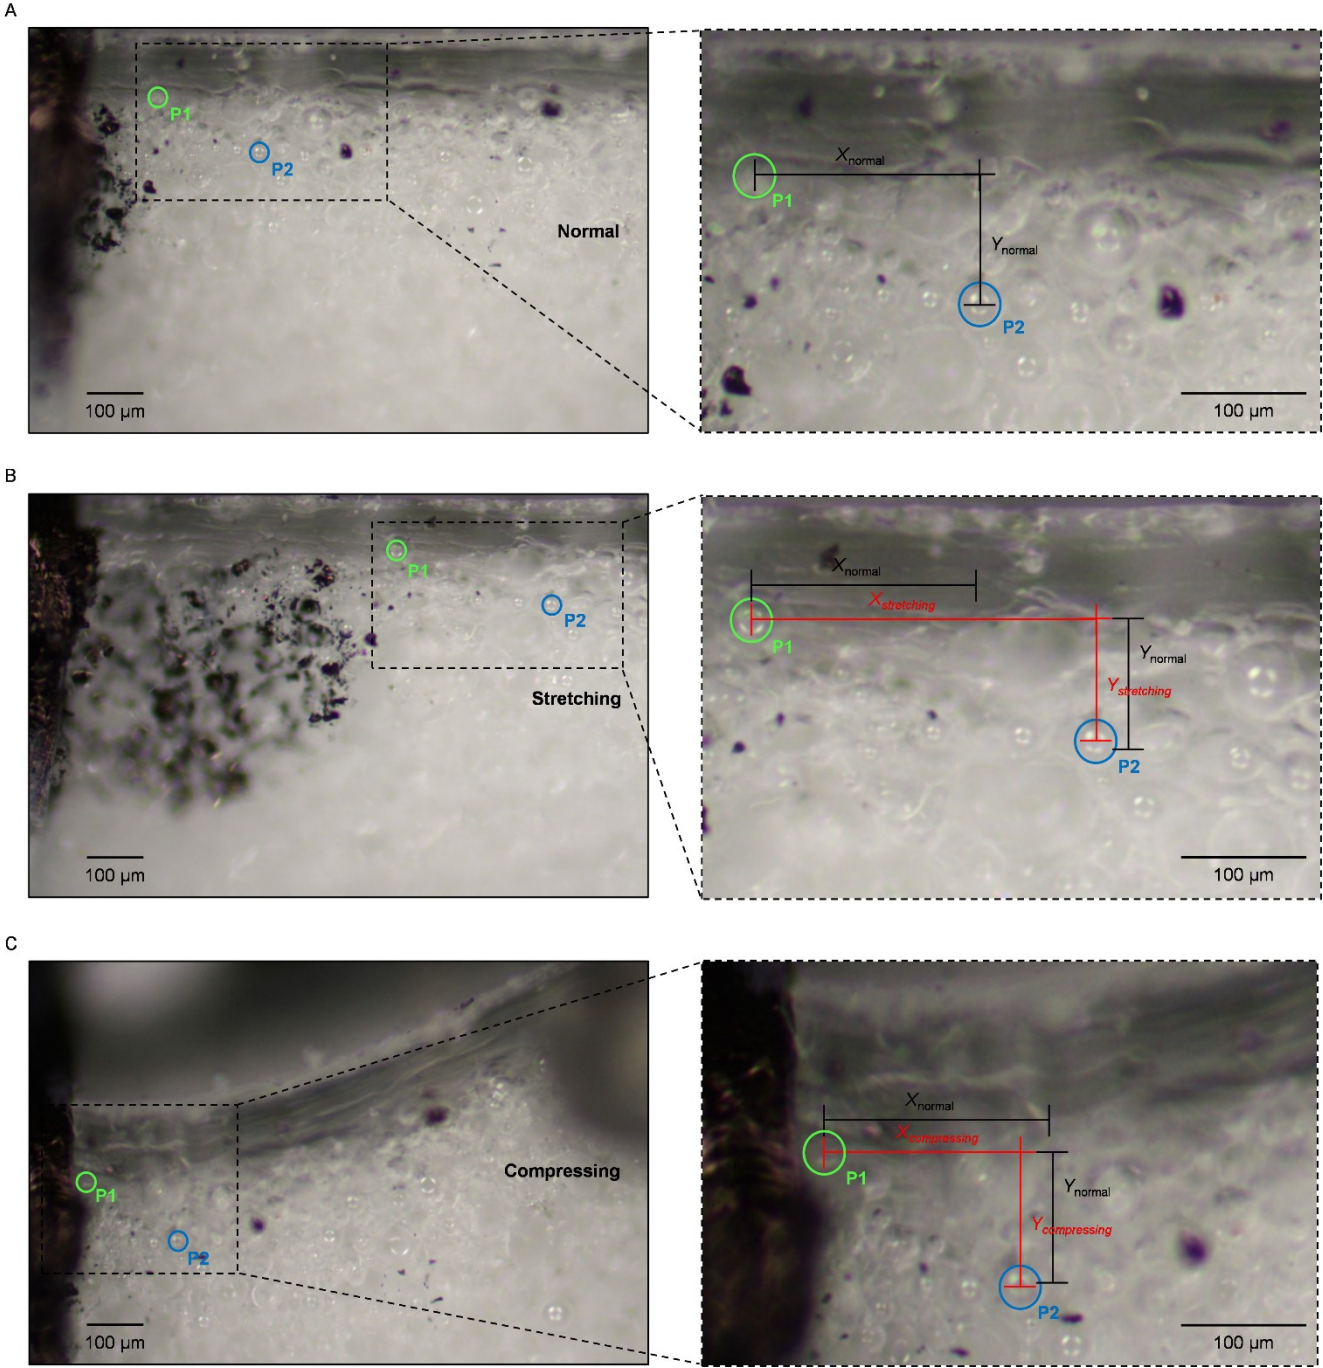

Figure S9

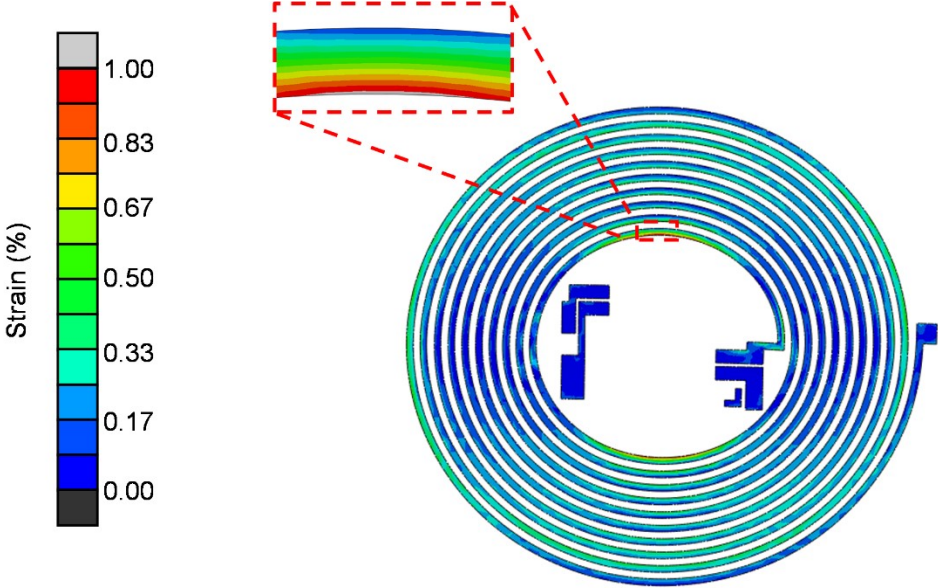

Figure S10

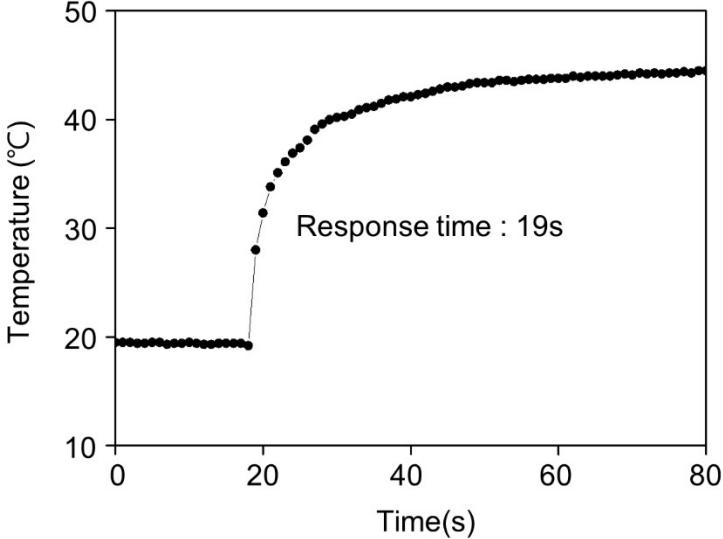

Figure S11

A

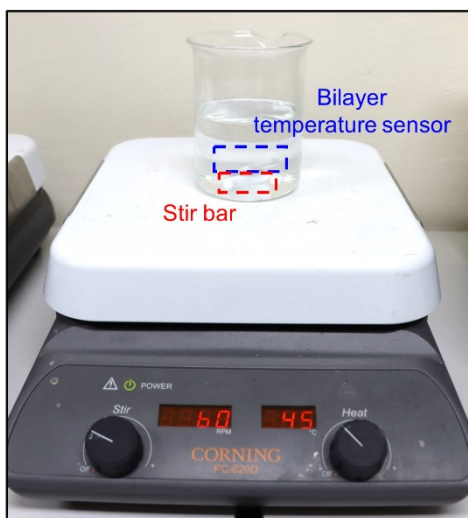

B

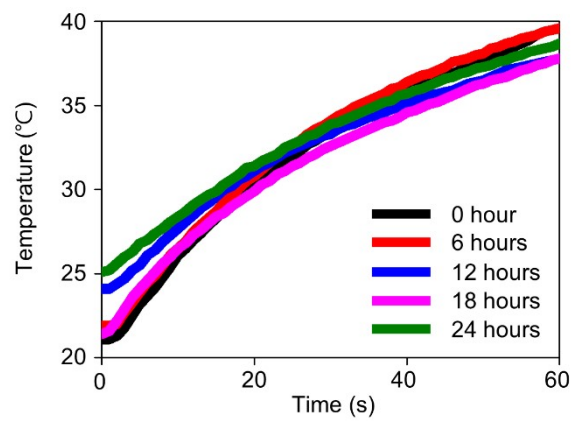

Figure S12

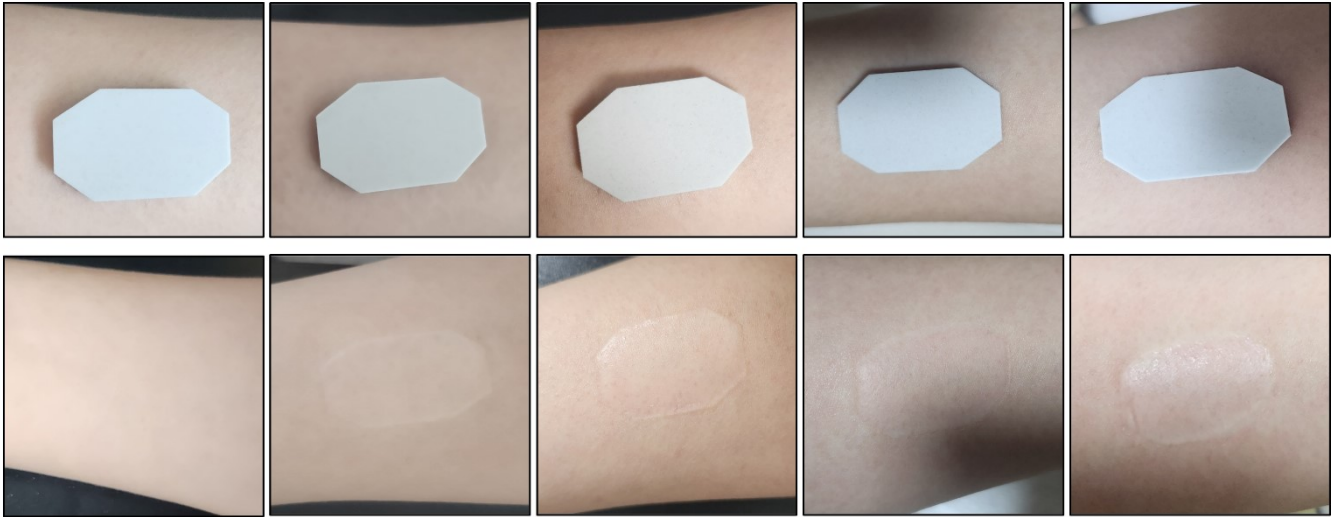

0 hour

6 hours

12 hours

18 hours

24 hours

Figure S13

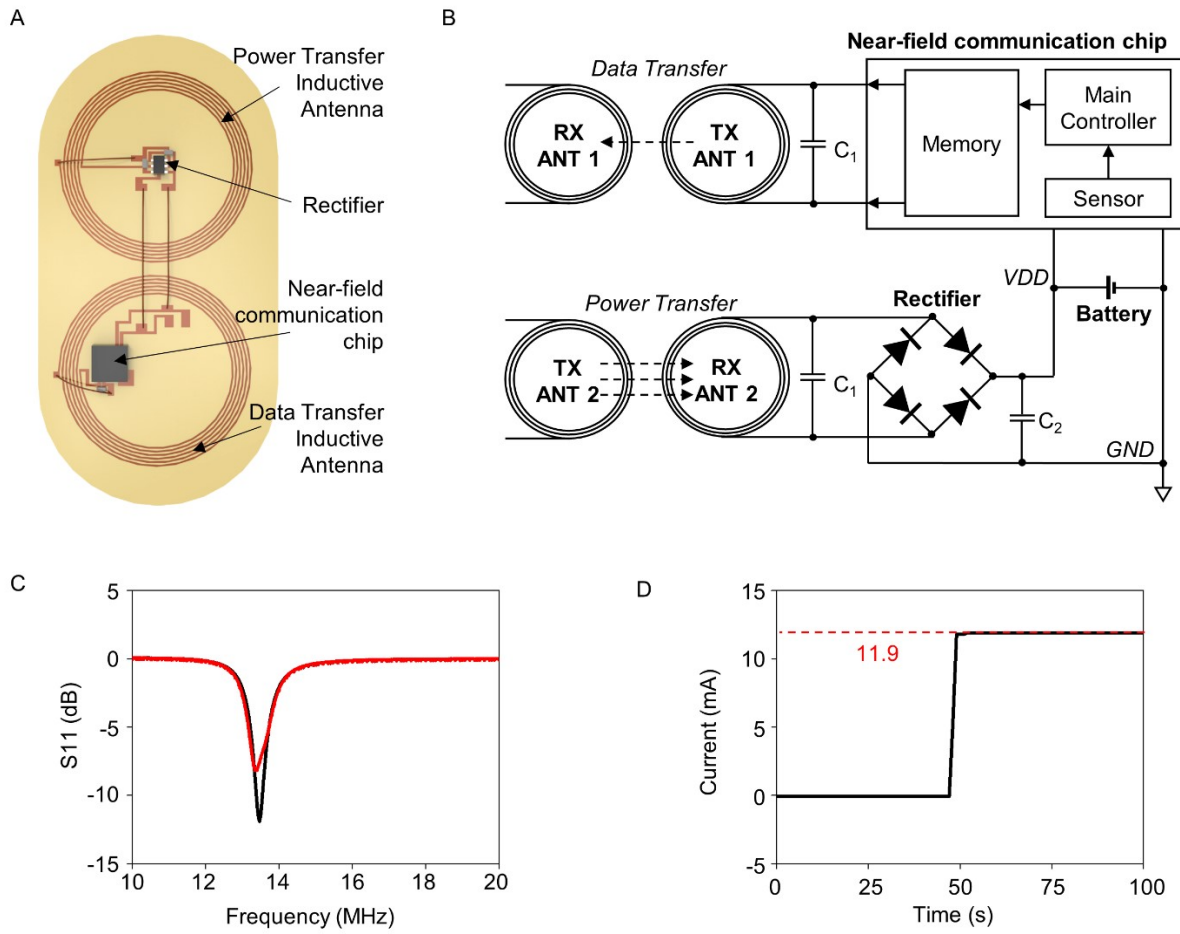



Figure S14

A

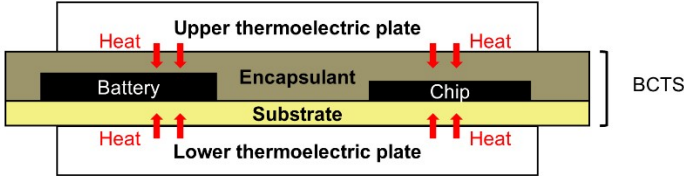

B

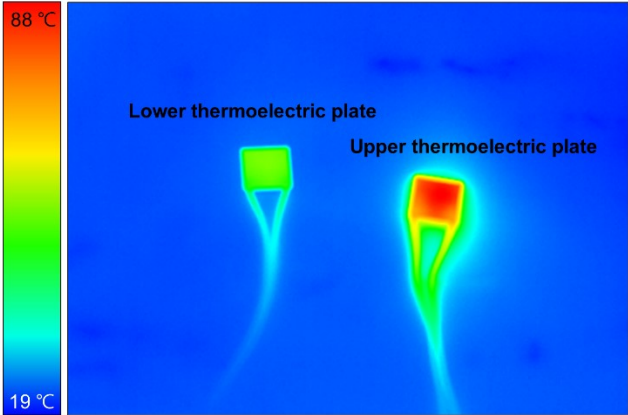

Figure S15

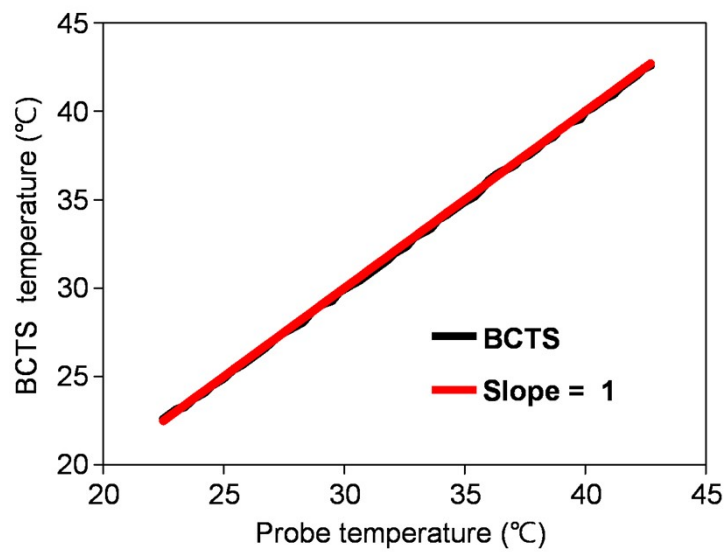

Figure S16

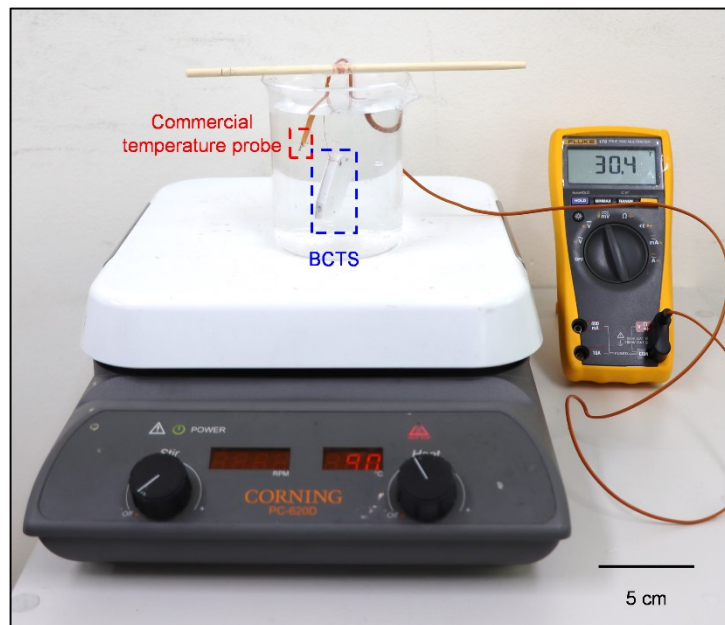

Figure S17

A

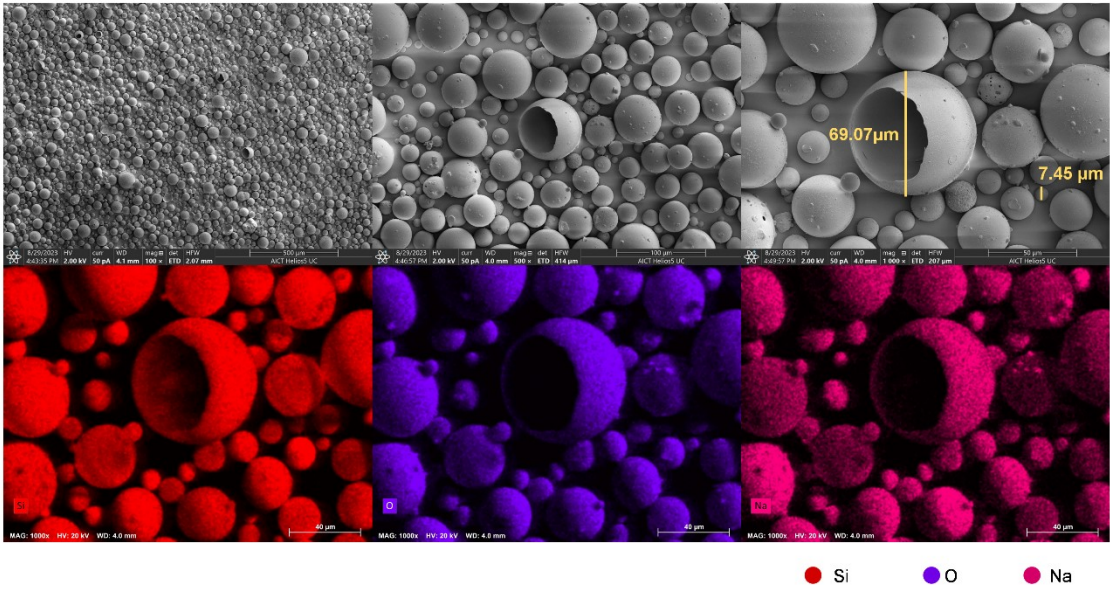

B

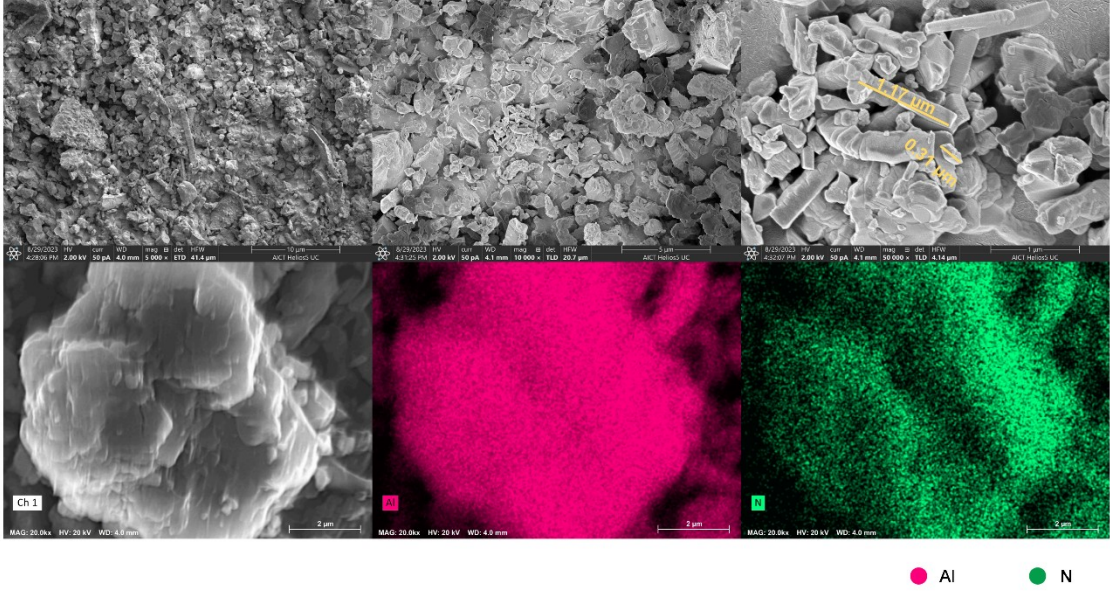

Supplement: d3nr05784d1.pdf [file d3nr05784d1.pdf]
